# Supplementary material for: Testing the effectiveness of a motivational interviewing-based brief intervention for substance use as an adjunct to usual care in community-based AIDS service organizations: study protocol for a multisite randomized controlled trial
Source: Springer Nature journal article supplement (doi:10.1186/s13722-017-0095-8), 2017-11-17
Supplement: MOESM2 [file 15233858]

## **DATA & SAFETY MONITORING BOARD**

The Substance Abuse Treatment to HIV care (SAT2HIV) Project includes a Phase III clinical trial focused on testing the effectiveness of a single 20-30 minute motivational interviewing-based brief intervention for substance use within AIDS Service Organizations. In addition to being conducted under the auspices of RTI International's Institutional Review Board (IRB), this project will be conducted with assistance from an independent Data & Safety Monitoring Board (DSMB). Below is the list of the DSMB members.

**Sonia Napravnik, PhD (DSMB Chairperson)**

University of North Carolina at Chapel Hill  
130 Mason Farm Rd, 2101 Bioinformatics Bldg  
Chapel Hill, NC 27599-7215  
Phone: 919-966-3875  
Email: *napravs@med.unc.edu*

Conflict(s) of Interest: NONE

**Carol Golin, MD (DSMB member)**

University of North Carolina at Chapel Hill  
310 Rosenau, Campus Box 7440  
Chapel Hill, NC 27599-7440  
Phone: 919-966-7939  
Email: *carol\_golin@med.unc.edu*

Conflict(s) of Interest: NONE

**Michael Hudgens, PhD (DSMB member)**

University of North Carolina at Chapel Hill  
3107-E McGavran-Greenberg  
Chapel Hill, NC 27599-7440  
Phone: 919-966-7253  
Email: *mhudgens@bios.unc.edu*

Conflict(s) of Interest: NONE
